# Supplementary material
Source: MDPI journal article supplement (https://www.mdpi.com/2073-4441/15/8/1468)
Supplement: s1 [file s1]

# Research on the Capacity of Underground Reservoirs in Coal Mines to Protect the Groundwater Resources : A Case of Zhangshuanglou Coal Mine in Xuzhou, China

Chenghang Zhang<sup>1,2</sup>, Bin Luo<sup>2,3,\*</sup>, Zhimin Xu<sup>2</sup>, Yajun Sun<sup>2</sup> and Lin Feng<sup>2</sup>

<sup>1</sup> School of Earth Sciences and Engineering, Sun Yat-sen University, Zhuhai, 519080, China

<sup>2</sup> School of Resources and Geosciences, China University of Mining and Technology, Xuzhou, 221116, China

<sup>3</sup> College of Ecology, Taiyuan University of Technology, Taiyuan, 030024, China

\* Corresponding author: [13685165782@163.com](mailto:13685165782@163.com)

**Table S1** Major chemical constituents of water samples in different zones of Coal Mine.

| Group | Sample name | sampling place             | pH  | DO<br>mg/L | ORP<br>mV | K <sup>+</sup> +Na <sup>+</sup><br>mg/L | Ca <sup>2+</sup><br>mg/L | Mg <sup>2+</sup><br>mg/L | Fe <sup>3+</sup><br>mg/L | Fe <sup>2+</sup><br>mg/L | NH <sub>4</sub> <sup>+</sup><br>mg/L | Sr<br>mg/L | Cl <sup>-</sup><br>mg/L | SO <sub>4</sub> <sup>2-</sup><br>mg/L | HCO <sub>3</sub> <sup>-</sup><br>mg/L | CO <sub>3</sub> <sup>2-</sup><br>mg/L | NO <sub>3</sub> <sup>-</sup><br>mg/L | NO <sub>2</sub> <sup>-</sup><br>mg/L | TDS<br>mg/L | CO <sub>2</sub><br>mg/L | H <sub>2</sub> SiO <sub>3</sub><br>mg/L | COD<br>mg/L |
|-------|-------------|----------------------------|-----|------------|-----------|-----------------------------------------|--------------------------|--------------------------|--------------------------|--------------------------|--------------------------------------|------------|-------------------------|---------------------------------------|---------------------------------------|---------------------------------------|--------------------------------------|--------------------------------------|-------------|-------------------------|-----------------------------------------|-------------|
| goaf  | XJL12       | goaf<br>closure in<br>2023 | 8.4 | 4.75       | 161.7     | 1412.5                                  | 261.2                    | 135.5                    | 0.06                     | <LQ                      | 0.01                                 | 6.3        | 131.7                   | 3626.6                                | 372.1                                 | 7.2                                   | 2.26                                 | 0.05                                 | 6016        | <LQ                     | 10.6                                    | 1.14        |
|       | XJL15       | goaf<br>closure in<br>2022 | 7.2 | 2.84       | 171.4     | 1665.5                                  | 339.9                    | 120.4                    | 0.49                     | <LQ                      | 0.45                                 | 8.5        | 147.1                   | 4268.3                                | 380.4                                 | —                                     | <LQ                                  | 3.74                                 | 6950        | 12.9                    | 10.7                                    | 3.38        |
|       | XJL16       | goaf<br>closure in<br>2021 | 7.3 | 2.96       | 254.6     | 2013.5                                  | 245.1                    | 85.3                     | 0.19                     | 0.19                     | 4.63                                 | 5.4        | 97.9                    | 4500.9                                | 646.1                                 | —                                     | <LQ                                  | 0.35                                 | 7614        | 9.4                     | 9.5                                     | 1.34        |
|       | XJL23       | goaf<br>closure in<br>2010 | 7.1 | 2.86       | 117.7     | 1157.7                                  | 345.6                    | 157.4                    | 0.07                     | 0.05                     | 2.80                                 | 6.3        | 235.0                   | 3239.3                                | 403.8                                 | —                                     | <LQ                                  | 0.06                                 | 5462        | 23.6                    | 14.5                                    | 1.67        |
|       | XJL24       | goaf<br>closure in<br>2012 | 7.5 | 3.22       | 230.5     | 1066.4                                  | 313.4                    | 129.1                    | 0.08                     | <LQ                      | <LQ                                  | 9.5        | 246.8                   | 2900.1                                | 321.9                                 | —                                     | 1.12                                 | 0.01                                 | 4918        | 14.6                    | 15.4                                    | 1.30        |
|       | XJL25       | goaf<br>closure in<br>2009 | 7.1 | 2.70       | 98.5      | 869.7                                   | 365.7                    | 117.0                    | 0.09                     | <LQ                      | 2.03                                 | 9.3        | 258.2                   | 2559.3                                | 319.4                                 | —                                     | <LQ                                  | 0.01                                 | 4428        | 24.8                    | 15.4                                    | 1.14        |

Note: TDS and COD refer to dissolved oxygen, oxidation-reduction potential, total dissolved solids and chemical oxygen demand, respectively.
